# Supplementary material for: Comparative Study of ZnO-and-TiO2-Nanoparticles-Functionalized Polyvinyl Alcohol/Chitosan Bionanocomposites for Multifunctional Biomedical Applications
Source: Polymers (Basel). 2023 Aug 19;15(16):3477. doi: 10.3390/polym15163477 (PMC10459413; doi:10.3390/polym15163477)
Supplement: Supplementary file 1 [file polymers-15-03477-s001.zip › polymers-2506777-SI.pdf]

Research Article

# Comparative Study of ZnO-and-TiO<sub>2</sub>-Nanoparticles-Functionalized Polyvinyl Alcohol/Chitosan Bionanocomposites for Multifunctional Biomedical Applications

Annu <sup>1,2,\*</sup>, Zafar Iqbal Bhat <sup>3</sup>, Khalid Imtiyaz <sup>3</sup>, M. Moshahid A. Rizvi <sup>3</sup>, Saiqa Ikram <sup>1,\*</sup> and Dong Kil Shin <sup>2,\*</sup>

<sup>1</sup> Thin-Film Engineering and Materials Laboratory, School of Mechanical Engineering, Yeungnam University, Gyeongsan 38541, Republic of Korea

<sup>2</sup> Bio/Polymers Research Laboratory, Department of Chemistry, Jamia Millia Islamia, New Delhi 110025, India

<sup>3</sup> Department of Biosciences, Jamia Millia Islamia, New Delhi 110025, India

\* Correspondence: annuchem92@gmail.com or drannu@yu.ac.kr (A.); sikram@jmi.ac.in (S.I.); dkshin@yu.ac.kr (D.K.S.)

## Supplementary Figures:

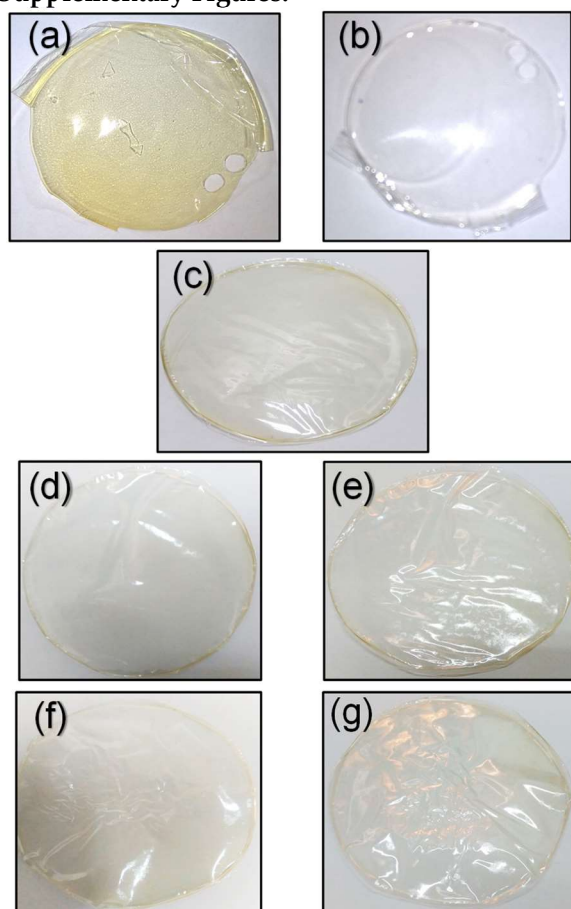

**Figure S1:** Visual representation of (a) pure CS, (b) pure PVA, (c) CS/PVA, (d) CPZ1, (e) CPZ2, (f) CPT1, and (g) CPT2

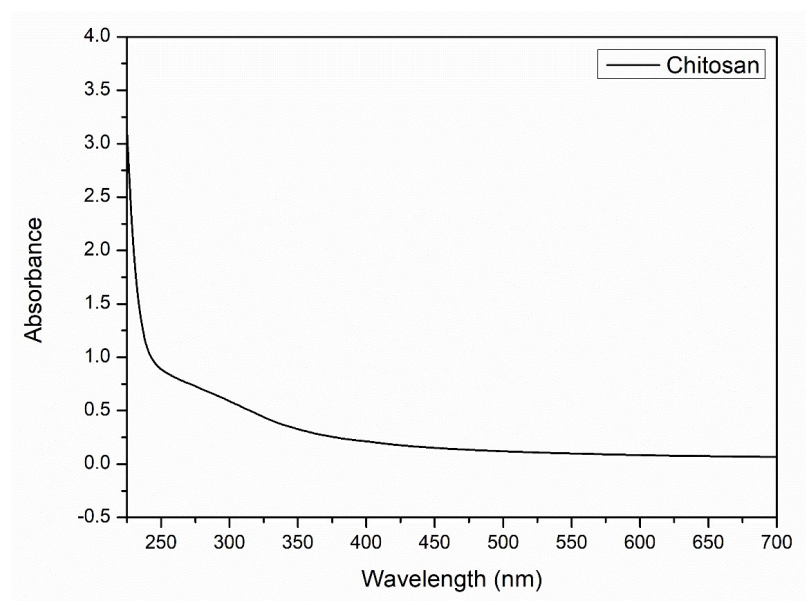

**Figure S2:** UV-Vis spectra of pure CS
